# Supplementary material
Source: PubMed Central journal article supplement (PMC8904646)
Supplement: NIHMS1765965-supplement-Supplemental_Table.pdf [file NIHMS1765965-supplement-Supplemental_Table.pdf]

**Table 1 SUPPLEMENTAL Crude and adjusted odds ratios and 95% CIs for having a cognitive disability by nativity status and arrival cohort (Ages 18+ Sensitivity Analysis)**

|                              | <b>Model 1<br/>(Crude)</b> | <b>Model 2<sup>a</sup><br/>(Demographic)</b> | <b>Model 3<sup>b</sup><br/>(Socioeconomic)</b> | <b>Model 4<sup>c</sup><br/>(Acculturation)</b> |
|------------------------------|----------------------------|----------------------------------------------|------------------------------------------------|------------------------------------------------|
| US-born Arab Americans (ref) | 1.00                       | 1.00                                         | 1.00                                           | --                                             |
| Foreign-born Arab Americans  | 1.32 (1.16, 1.50)          | 1.41 (1.24, 1.61)                            | 0.97 (0.84, 1.12)                              |                                                |
| Arrival cohort               |                            |                                              |                                                |                                                |
| Foreign-born, < 1991 (ref)   | 1.00                       | 1.00                                         | 1.00                                           | 1.00                                           |
| Foreign-born, 1991-2000      | 0.85 (0.70, 1.02)          | 1.23 (1.01, 1.51)                            | 1.06 (0.86, 1.31)                              | 0.98 (0.79, 1.22)                              |
| Foreign-born, 2001-2013      | 1.05 (0.87, 1.28)          | 1.32 (1.09, 1.61)                            | 1.12 (0.91, 1.37)                              | 1.05 (0.83, 1.33)                              |
| Foreign-born, 2014-2018      | 0.97 (0.68, 1.36)          | 1.27 (0.88, 1.83)                            | 1.02 (0.70, 1.48)                              | 1.00 (0.65, 1.53)                              |

*Model 2 Demographic – adjusts for age and sex.*

*Model 3 Socioeconomic – adjusts for Model 2 + education, poverty level, marital status.*

*Model 4 Acculturation – adjusts for Model 3 + language, citizenship.*

**Table 2 SUPPLEMENTAL Crude and adjusted odds ratios and 95% CIs for having a cognitive disability by nativity status and arrival cohort (Ages 65+ Sensitivity Analysis)**

|                              | <b>Model 1<br/>(Crude)</b> | <b>Model 2<sup>a</sup><br/>(Demographic)</b> | <b>Model 3<sup>b</sup><br/>(Socioeconomic)</b> | <b>Model 4<sup>c</sup><br/>(Acculturation)</b> |
|------------------------------|----------------------------|----------------------------------------------|------------------------------------------------|------------------------------------------------|
| US-born Arab Americans (ref) | 1.00                       | 1.00                                         | 1.00                                           | --                                             |
| Foreign-born Arab Americans  | 1.93 (1.59, 2.33)          | 2.19 (1.80, 2.66)                            | 1.54 (1.24, 1.92)                              |                                                |
| Arrival cohort               |                            |                                              |                                                |                                                |
| Foreign-born, < 1991 (ref)   | 1.00                       | 1.00                                         | 1.00                                           | 1.00                                           |
| Foreign-born, 1991-2000      | 0.76 (0.45, 1.28)          | 1.50 (1.14, 1.97)                            | 1.27 (0.95, 1.69)                              | 1.12 (0.83, 1.51)                              |
| Foreign-born, 2001-2013      | 1.15 (0.89, 1.50)          | 1.31 (1.00, 1.73)                            | 1.13 (0.85, 1.50)                              | 1.11 (0.81, 1.53)                              |
| Foreign-born, 2014-2018      | 0.76 (0.45, 1.28)          | 0.84 (0.48, 1.45)                            | 0.73 (0.43, 1.25)                              | 0.82 (0.45, 1.51)                              |

*Model 2 Demographic – adjusts for age and sex.*

*Model 3 Socioeconomic – adjusts for Model 2 + education, poverty level, marital status.*

*Model 4 Acculturation – adjusts for Model 3 + language, citizenship.*

**Table 3 SUPPLEMENTAL. Crude and adjusted odds ratios and 95% CIs for having a cognitive disability by nativity status and arrival cohort with covariates.**

|                              | <b>Model 1<br/>(Crude)</b> | <b>Model 2<sup>a</sup><br/>(Demographic)</b> | <b>Model 3<sup>b</sup><br/>(Socioeconomic)</b> | <b>Model 4<sup>c</sup><br/>(Acculturation)</b> |
|------------------------------|----------------------------|----------------------------------------------|------------------------------------------------|------------------------------------------------|
| US-born Arab Americans (ref) | 1.00                       | 1.00                                         | 1.00                                           | --                                             |
| Foreign-born Arab Americans  | 1.32 (1.16, 1.50)          | 1.41 (1.24, 1.61)                            | 0.96 (0.83, 1.12)                              |                                                |
| Age                          |                            | 1.06 (1.06, 1.07)                            | 1.05 (1.04, 1.05)                              |                                                |
| Sex                          |                            |                                              |                                                |                                                |
| Female                       |                            | 1.00                                         | 1.00                                           | --                                             |
| Male                         |                            | 0.77 (0.68, 0.87)                            | 1.09 (0.95, 1.25)                              |                                                |
| Marital Status               |                            |                                              |                                                |                                                |
| Not married                  |                            |                                              | 1.00                                           | --                                             |
| Married                      |                            |                                              | 0.49 (0.43, 0.56)                              |                                                |
| Highest Level of Education   |                            |                                              |                                                |                                                |
| College degree or more       |                            |                                              | 1.00                                           | --                                             |
| Some college                 |                            |                                              | 1.57 (1.30, 1.90)                              |                                                |
| HS graduate                  |                            |                                              | 1.90 (1.56, 2.31)                              |                                                |
| None/Less than HS            |                            |                                              | 3.73 (3.08, 4.50)                              |                                                |

|                            |                   |                   |                   |                   |
|----------------------------|-------------------|-------------------|-------------------|-------------------|
| Poverty Level              |                   |                   |                   |                   |
| ≥500%                      |                   |                   | 1.00              | --                |
| 232% to 500%               |                   |                   | 1.51 (1.25, 1.82) |                   |
| ≥125%                      |                   |                   | 1.91 (1.63, 2.24) |                   |
| Arrival cohort             |                   |                   |                   |                   |
| Foreign-born, < 1991 (ref) | 1.00              | 1.00              | 1.00              | 1.00              |
| Foreign-born, 1991-2000    | 0.69 (0.67, 0.71) | 1.06 (1.03, 1.09) | 1.00 (0.97, 1.03) | 1.05 (1.01, 1.08) |
| Foreign-born, 2001-2013    | 0.71 (0.69, 0.73) | 1.02 (0.99, 1.05) | 0.92 (0.89, 0.95) | 1.03 (0.99, 1.07) |
| Foreign-born, 2014-2018    | 0.57 (0.53, 0.61) | 0.75 (0.69, 0.81) | 0.70 (0.64, 0.75) | 0.81 (0.74, 0.88) |
| Age                        |                   | 1.07 (1.06, 1.08) | 1.05 (1.04, 1.06) | 1.05 (1.04, 1.06) |
| Sex                        |                   |                   |                   |                   |
| Female                     |                   | 1.00              | 1.00              | 1.00              |
| Male                       |                   | 0.71 (0.61, 0.82) | 1.03 (0.86, 1.22) | 1.03 (0.86, 1.24) |
| Marital Status             |                   |                   |                   |                   |
| Not married                |                   |                   | 1.00              | 1.00              |
| Married                    |                   |                   | 0.54 (0.45, 0.64) | 0.54 (0.45, 0.65) |
| Highest Level of Education |                   |                   |                   |                   |
| College degree or more     |                   |                   | 1.00              | 1.00              |
| Some college               |                   |                   | 1.80 (1.39, 2.31) | 1.69 (1.28, 2.24) |
| HS graduate                |                   |                   | 1.87 (1.43, 2.44) | 1.65 (1.22, 2.23) |
| None/Less than HS          |                   |                   | 3.78 (3.00, 4.76) | 3.00 (2.29, 3.94) |
| Poverty Level              |                   |                   |                   |                   |
| ≥500%                      |                   |                   | 1.00              | 1.00              |
| 232% to 500%               |                   |                   | 1.28 (1.02, 1.60) | 1.23 (0.97, 1.56) |
| ≥125%                      |                   |                   | 1.60 (1.33, 1.92) | 1.52 (1.26, 1.84) |

*Model 2 Demographic – adjusts for age and sex.*

*Model 3 Socioeconomic – adjusts for Model 2 + education, poverty level, marital status.*

*Model 4 Acculturation – adjusts for Model 3 + language, citizenship.*
